# Supplementary material for: Efficient artificial light-harvesting systems with gel properties formed by ion recognition
Source: Royal Society of Chemistry journal article supplement (doi:10.1039/d2ma00339b), 2022-01-01
Supplement: d2ma00339b1.pdf [file d2ma00339b1.pdf]

## Supporting information

### Efficient artificial light-harvesting systems with gel properties formed by ion recognition

Xinxian Ma\*, Bo Qiao#, Jinlong Yue, Yutao Geng, Yingshan Lai, Jiali Zhang, Enke Feng, Zhenliang Li, Xingning Han

*College of Chemistry and Chemical Engineering, Ningxia Normal University, Guyuan 756000, People's Republic of China. Fax: 86 954 2079637; Tel: 86 954 2079637; E-mail: maxinxian@163.com*

#### Materials

##### 1. Instrumentation and methods

All reactions were taken place in the air except as otherwise noted. All measurements were carried out at room temperature. All chemicals were used without further purification, unless otherwise noted. 2-(2-nonyl-1H-benzimidazol-1-yl) propanohydrazide salicylaldehyde was purchased from Shanghai Bangcheng Chemical Co. Ltd.. Rhodamine B was purchased from China Pharmaceutical Corporation Beijing Purchasing and Supply Station.

NMR spectra were carried out on a Bruker 400 MHz spectrometer with internal standard tetramethylsilane (TMS) and solvent signals as internal references at room temperature, and the chemical shifts were showed in ppm. The HRMS spectra were carried out on Agilent 6550 of Thermo Fisher-QE. The morphologies of the synthesized samples were characterized with a JSM-6701F SEM using an accelerating voltage of 5kV. The UV-Vis absorption spectra were measured on UV-1750 spectrophotometer. The fluorescence spectra were measured on RF-6000 instrument. The quantum yields were measured on a FLS980 fluorescence spectrometer. X-ray

diffraction patterns (XRD) performed with XPert PRO .

## 2. Synthesis and characterization of gelator G3

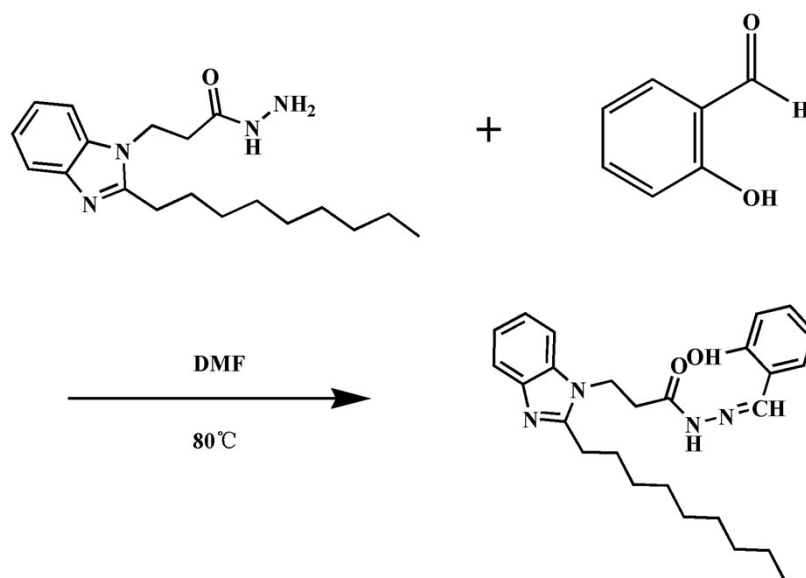

**Scheme S1.** Synthesis of gelator G3

Synthesis of Gelator G3: 2-(2-nonyl-1H-benzimidazol-1-yl) propanohydrazide (8 g, 0.023 mol) was mixed with Salicylaldehyde (2.84 g, 0.023 mol) in DMF solution and was refluxed for 8 h. After the reaction mixture was cooled to room temperature, the mixture was added to distilled water and lots of solid powder was precipitated by filtration. Then the precipitate was filtered and washed with ethyl alcohol, then dried under vacuum to gelator G3. Yield: 9.02g (83%).

$^1\text{H}$  NMR (400 MHz,  $\text{DMSO}-d_6$ )  $\delta$  (ppm): 11.69 (d,  $J = 5.0$  Hz, 1H), 11.33 – 11.13 (m, 1H), 10.10 (d,  $J = 3.1$  Hz, 1H), 8.30 (d,  $J = 31.2$  Hz, 1H), 7.61 – 7.43 (m, 3H), 7.31 – 7.08 (m, 3H), 6.98 – 6.79 (m, 2H), 4.25 (dd,  $J = 14.4, 7.2$  Hz, 2H), 2.92 – 2.79 (m,

2H), 2.69 (dd,  $J = 17.8, 10.8$  Hz, 1H), 2.30 (t,  $J = 7.0$  Hz, 1H), 2.10 – 1.96 (m, 2H), 1.86 – 1.73 (m, 2H), 1.57 – 1.07 (m, 12H), 0.84 (dd,  $J = 6.5, 4.3$  Hz, 3H).

$^{13}\text{C}$  NMR (101 MHz, DMSO)  $\delta$  173.72 – 173.52 (m), 168.34 (s), 158.03 (s), 156.75 (s), 155.46 (s), 147.03 (s), 142.97 (s), 135.43 (s), 131.64 (s), 129.81 (s), 126.93 (s), 121.88 (s), 119.72 (s), 118.51 (s), 116.79 (s), 110.40 (s), 42.57 (s), 31.76 (s), 30.86 (s), 29.34 (s), 27.53 (s), 26.83 (s), 25.18 (s), 22.56 (s), 14.42 (s). ESI-MS:  $m/z$  (L + H) $^{+}$  448.29.

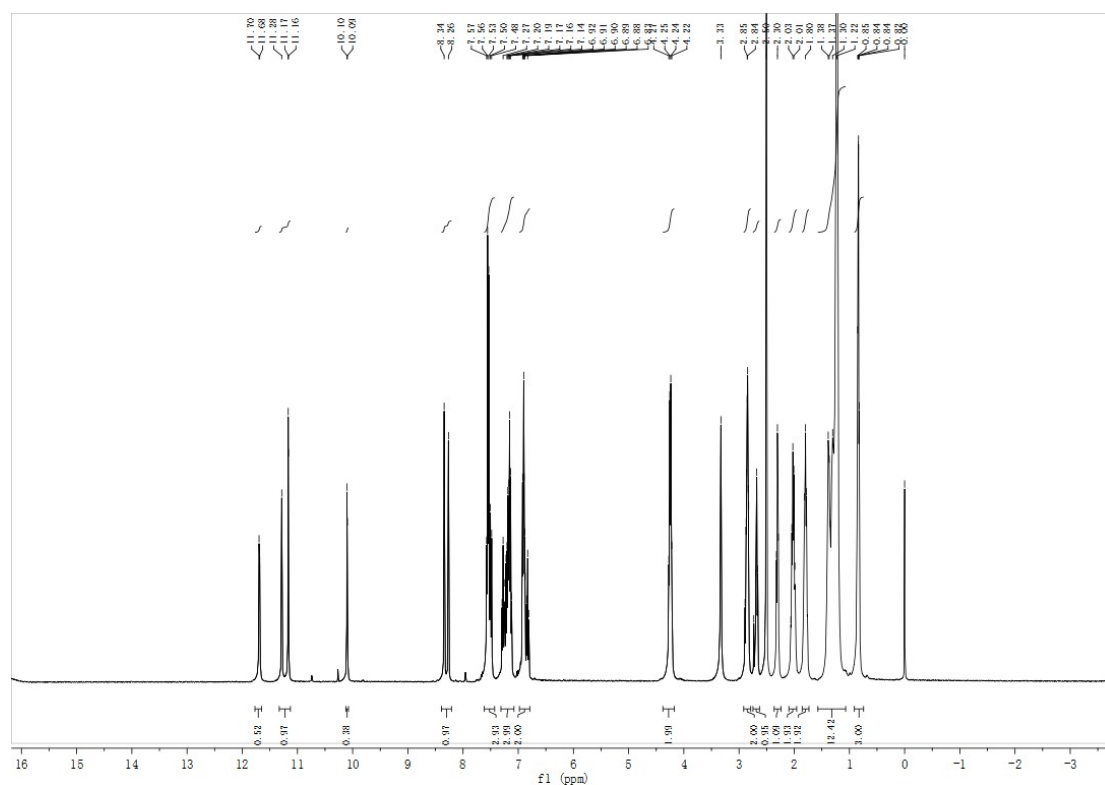

**Fig. S1.**  $^1\text{H}$  NMR spectrum of gelator G3

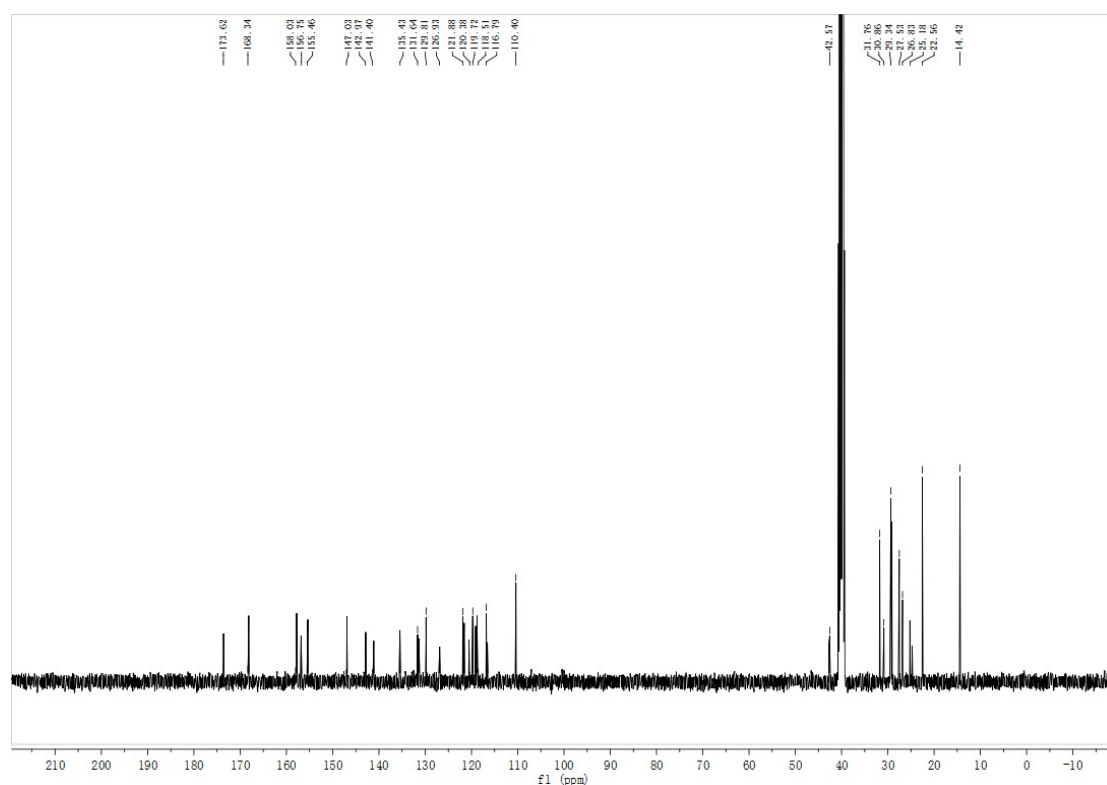

**Fig. S2.**  $^{13}\text{C}$  NMR spectrum of gelator G3

MS Zoomed Spectrum

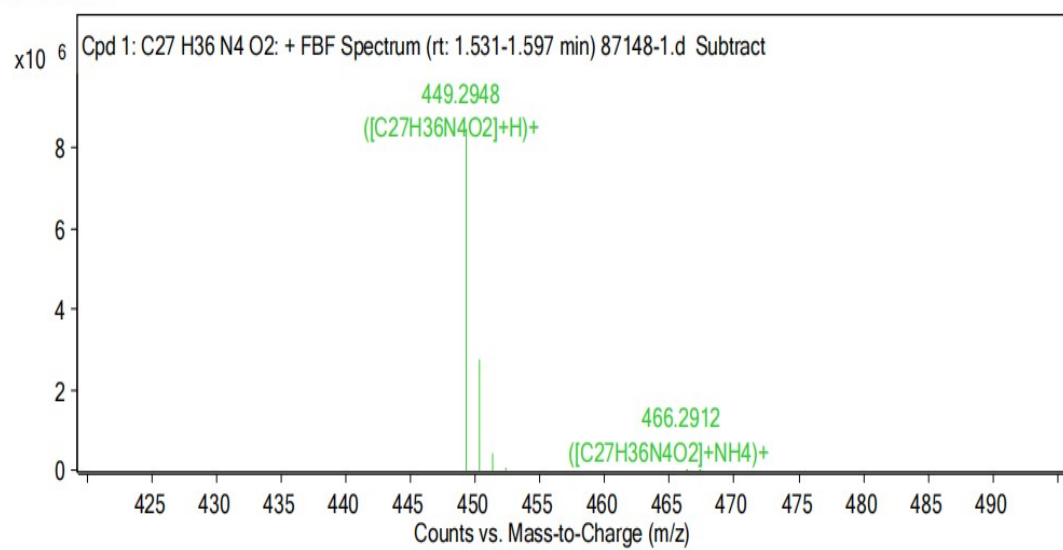

**Fig. S3.** HRMS spectra of gelator G3

### **3. FT-IR spectra**

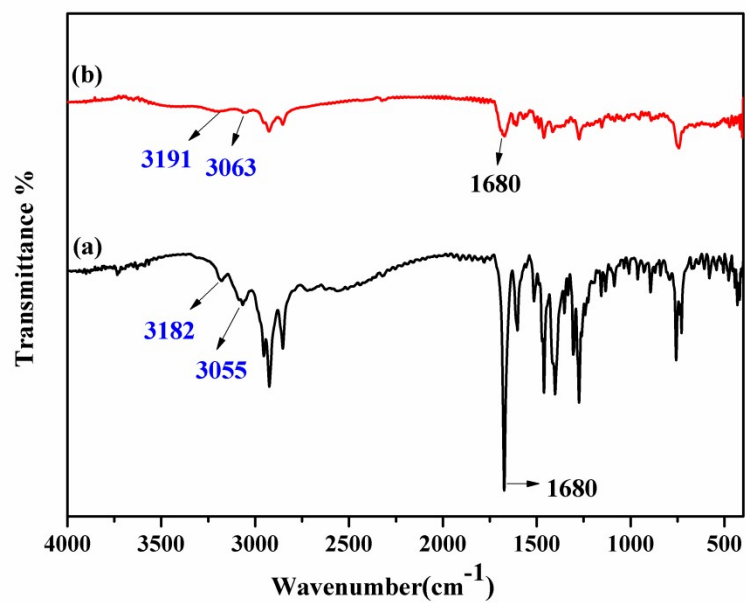

**Fig. S4** FT-IR spectra of the gelator G3 (a) and G3-Mg<sup>2+</sup> complex (b)

#### 4. The figure of mechanism

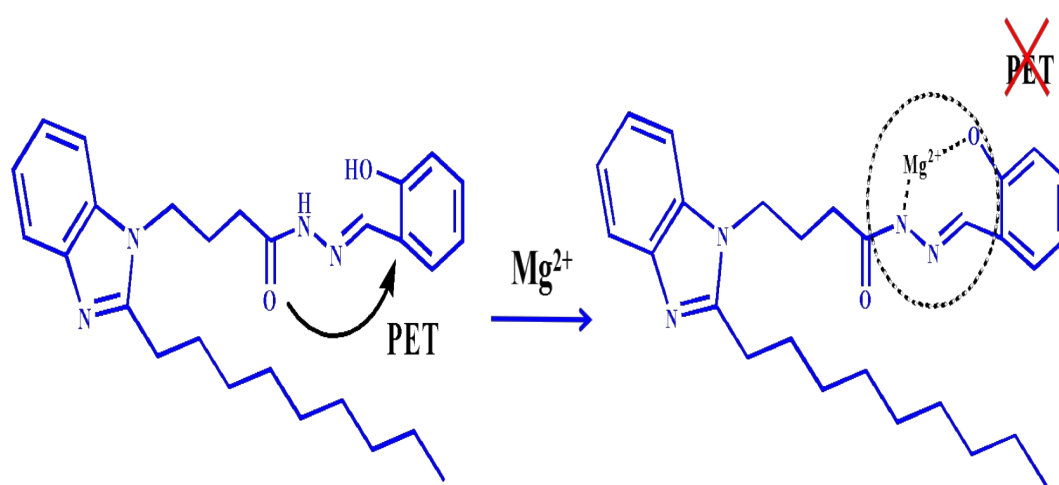

**Fig. S5** The possible luminescence mechanism of the G3@Mg-sol

## **5. XRD**

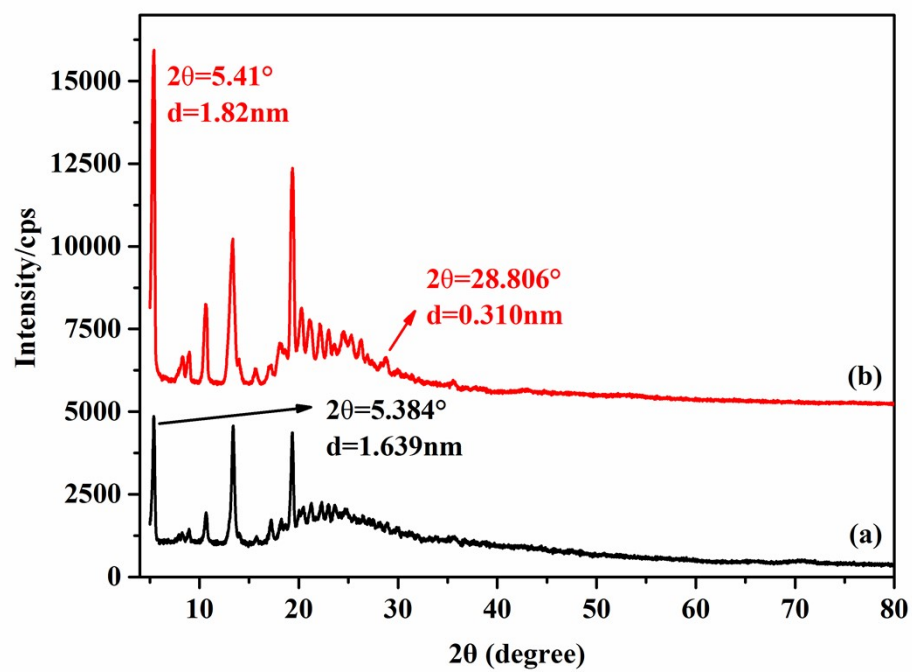

**Fig. S6** XRD of the gelator G3 (a) and G3- $\text{Mg}^{2+}$  complex (b)



## 6. Fluorescence lifetime of G3@Mg-sol and G3@Mg-sol/RhB

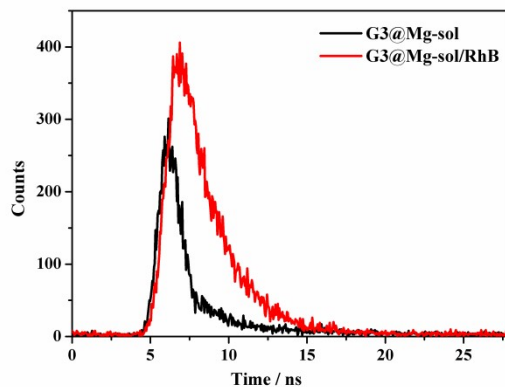

**Fig. S7** The fluorescence lifetime of (a) G3@Mg-sol and G3@Mg-sol/RhB

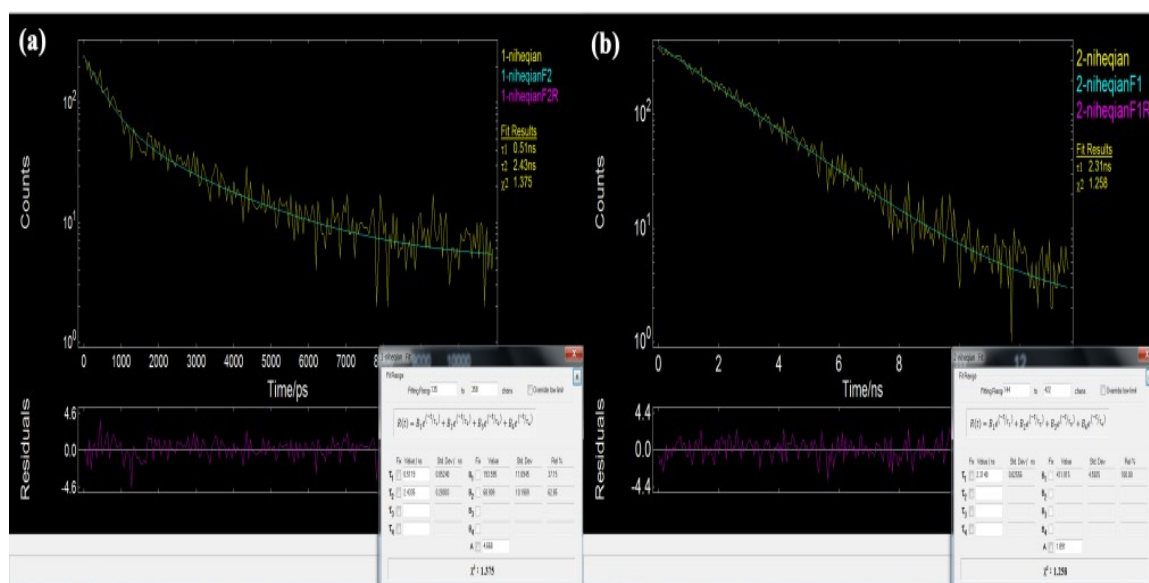

**Fig. S8** The fluorescence lifetimes of (a) G3@Mg-sol; (b) G3@Mg-sol/RhB

## 7. Fluorescence quantum yield of G3@Mg-sol/RhB

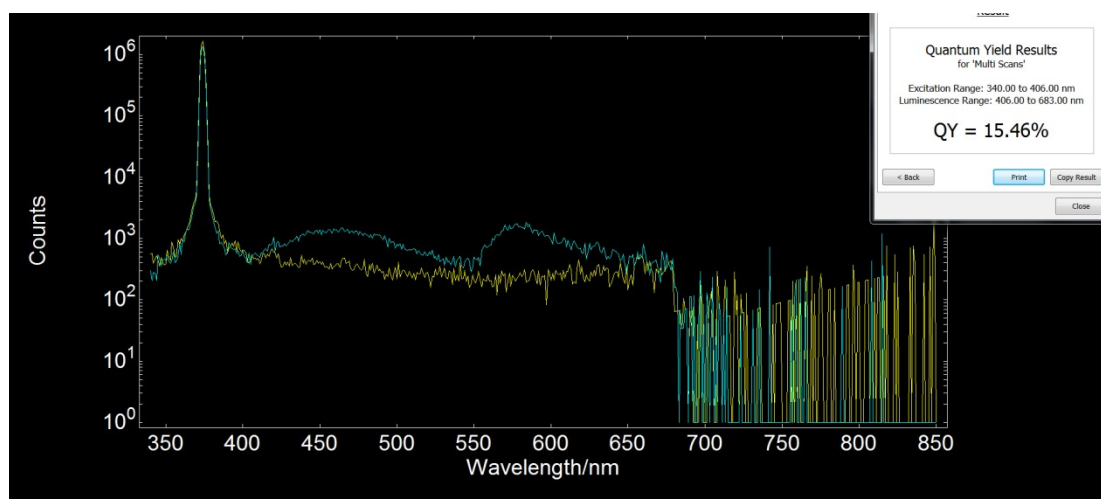

**Fig. S9** The fluorescence quantum yield at molar ratio

of the G3@Mg-sol/ RhB was 50:1

## 8. Energy transfer efficiency ( $\Phi_{ET}$ )

The energy-transfer efficiency ( $\Phi_{ET}$ ) was calculated using the following equation:

$$\Phi_{ET} = 1 - I_{DA}/I_D$$

Where  $I_{DA}$  and  $I_D$  are the fluorescence intensities of the emission of G3@Mg-sol/RhB (donor and acceptor) and G3@Mg-sol (donor), respectively when excited at 374 nm.

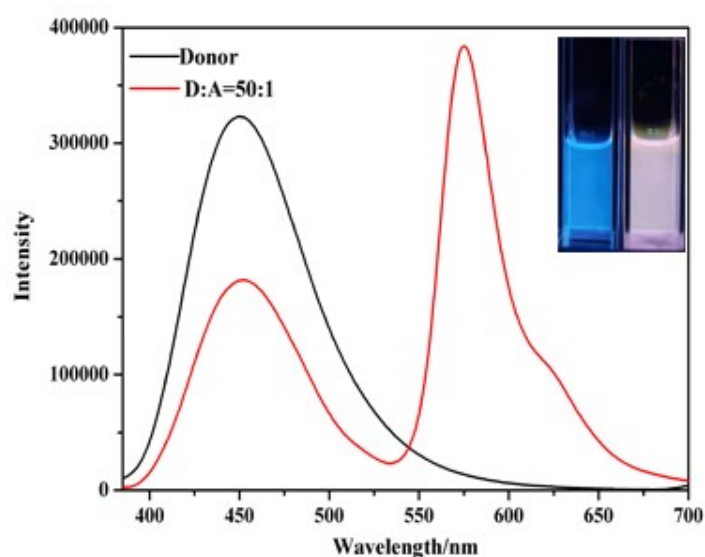

**Fig. S10.** Fluorescence spectra of G3@Mg-sol and G3@Mg-sol/RhB in ethanol and H<sub>2</sub>O ( $\lambda_{ex}$ =374 nm). Inset: photographs of G3@Mg-sol and G3@Mg-sol/RhB under 365 nm UV light (G3@Mg-sol = 1  $\mu$ M, RhB = 0.02  $\mu$ M)

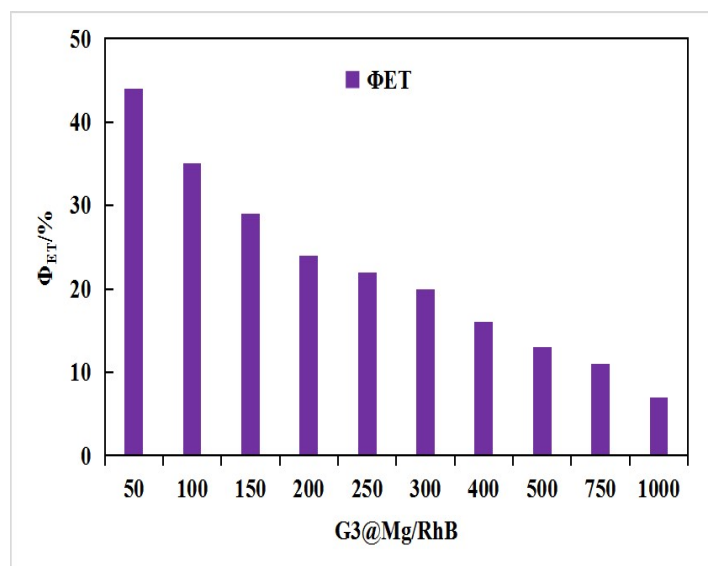

**Fig. S11.** The energy transfer efficiency of G3@Mg-sol/RhB at different ratios

## 9. Antenna effect

The antenna effect under certain concentrations of donor and acceptor equals the ratio of the emission of the acceptor upon excitation of the donor.<sup>2</sup>

$$AE = [I_{DA}(\lambda_{ex}=\text{donor}) - I_D(\lambda_{ex}=\text{donor})] / I_{DA}(\lambda_{ex}=\text{acceptor})$$

Where  $I_{DA}(\lambda_{ex} = \text{donor})$  and  $I_{DA}(\lambda_{ex} = \text{acceptor})$  are the fluorescence intensities at 577 nm with excitation of the donor at 374 nm and direct excitation of the acceptor at 440 nm, respectively.  $I_D(\lambda_{ex} = \text{donor})$  is the fluorescence intensities of the G3@Mg-sol assembly, which was normalized with the G3@Mg-sol/RhB assembly at 440 nm.

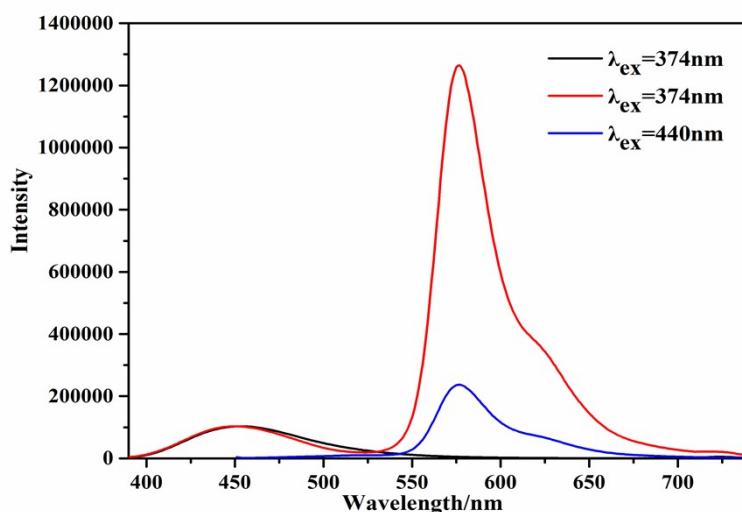

**Fig S12.** Fluorescence spectra of G3@Mg-sol/RhB (red line), black line (donor emission,  $\lambda_{ex} = 374$  nm), blue trace (acceptor emission,  $\lambda_{ex} = 440$  nm). The black line represents the fluorescence spectrum of G3@Mg-sol, which was normalized according to the fluorescence intensity at 453 nm of the red line (  $[G3@Mg-sol] = 1\mu M,$   $[RhB] = 0.02\mu M$  )

## 10. Gelation property of gelator G3

**Table S1.** Gelation property of gelator G3

| Entry | Solvent          | State |
|-------|------------------|-------|
| 1     | n-Butyl alcohol  | P     |
| 2     | Propyl alcohol   | P     |
| 3     | Ethanediol       | G     |
| 4     | Glycol and water | G     |
| 5     | Ethyl acetate    | P     |
| 6     | Acetonitrile     | P     |
| 7     | Methanol         | PG    |
| 8     | Clycerol         | P     |
| 9     | Isoamyl alcohol  | S     |
| 10    | Isopropanol      | P     |
| 11    | Dichloromethane  | P     |
| 12    | Ethanol          | PG    |
| 13    | DMF              | S     |
| 14    | DMSO             | S     |
| 15    | Cyclohexane      | P     |
| 16    | Petroleum ether  | S     |
| 17    | Tetrahydrofuran  | S     |
| 18    | Chloroform       | S     |
| 19    | Acetone          | S     |

<sup>a</sup>G, P, S and PG denote gelation, precipitation, solution and part gelation, respectively.

<sup>b</sup>The critical gelation concentration (wt %, 10 mg/mL)

## **11. The G3-gel**

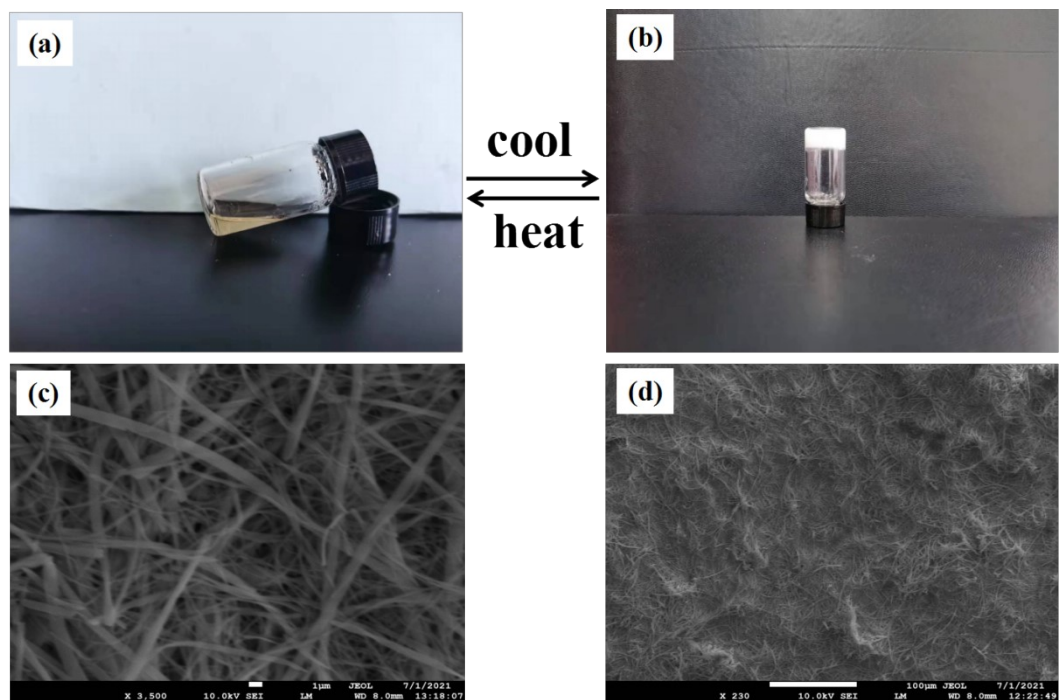

**Fig. S13.** a,b) the reversible gel-sol transformation of the G3-gel by temperature;

c, d) SEM images of G3-gel in mixed solutions

## 12. The G3@Mg-sol and G3@Mg-gel

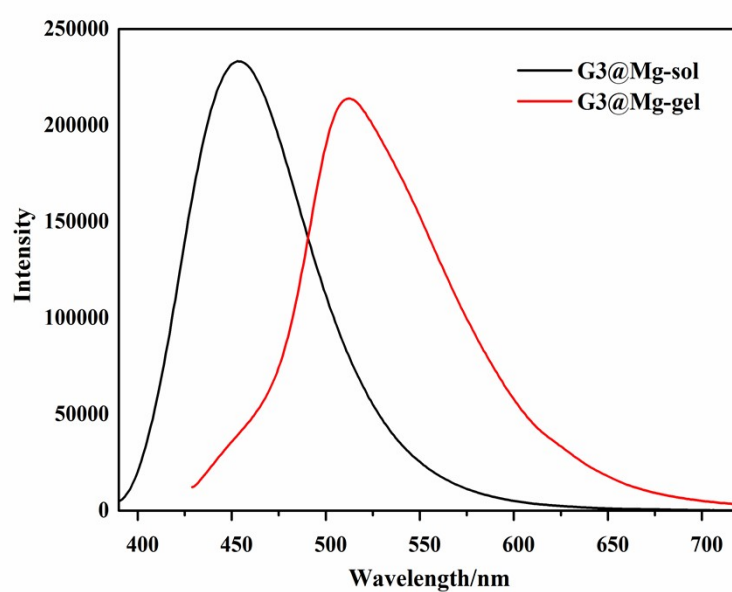

**Fig. S14** Emission spectra of G3@Mg-sol and G3@Mg-gel

### 13. The energy transfer of G3@Mg-gel

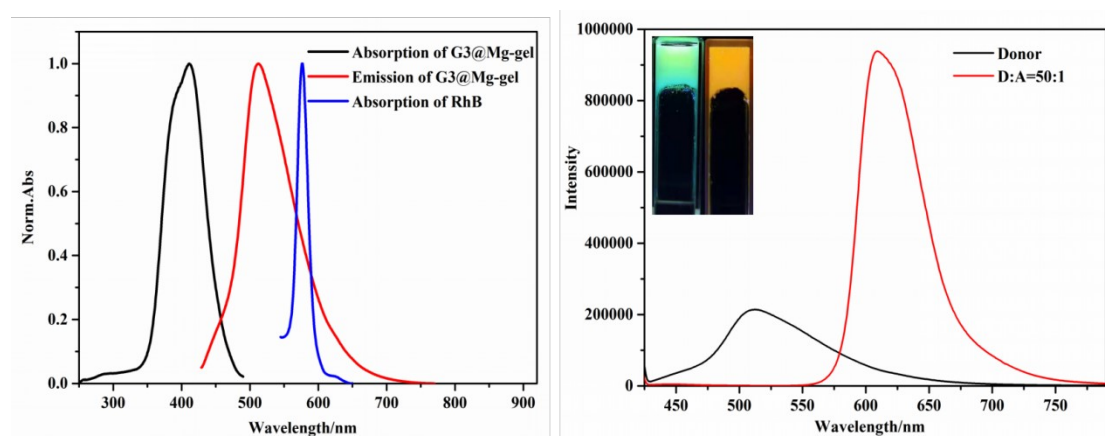

**Fig. S15** (a) Normalized absorption and emission spectrum of G3@Mg-gel, absorption spectrum of RhB; (b) Fluorescence spectrum of G3@Mg-gel/RhB ([G3@Mg-gel] = 45 $\mu$ M, [RhB]=0.9 $\mu$ M) in glycol and water with the ratio is 50:1 of G3@Mg-gel/RhB (Inset: photographs of G3@Mg-gel/RhB)

#### **14. The fluorescence lifetimes of G3@Mg-gel and G3@Mg-gel/RhB**

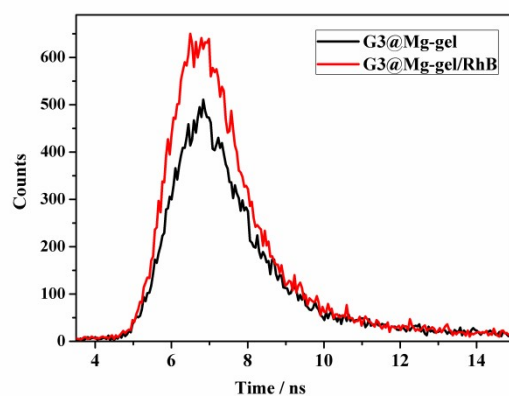

**Fig. S16** The fluorescence lifetimes of (a) G3@Mg-gel; (b) G3@Mg-gel/RhB

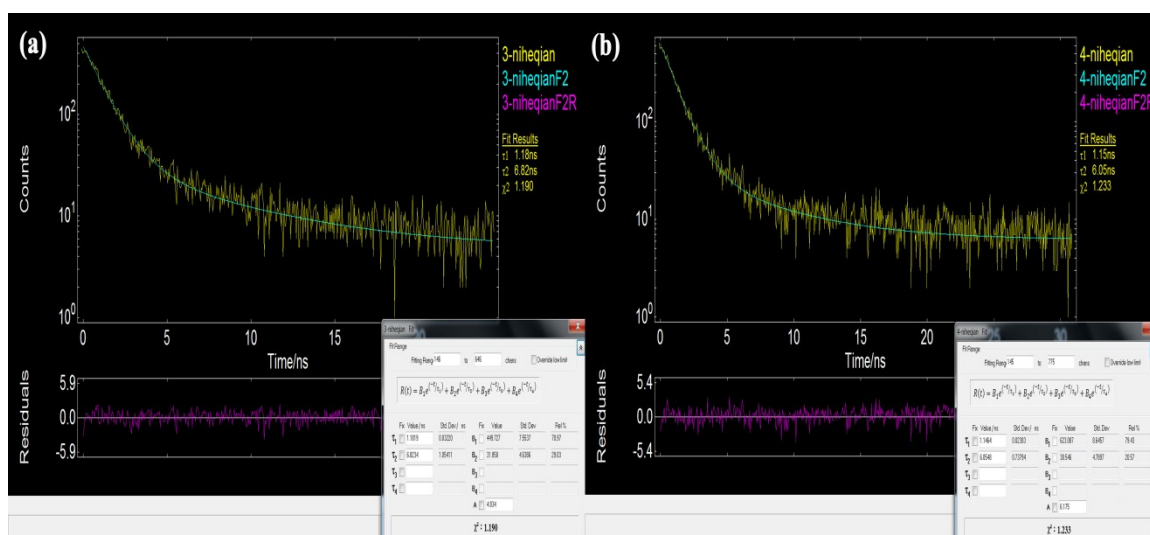

**Fig. S17** The fluorescence lifetimes of (a) G3@Mg-gel; (b) G3@Mg-gel/RhB

## 15. Fluorescence quantum yield of G3@Mg- gel/RhB

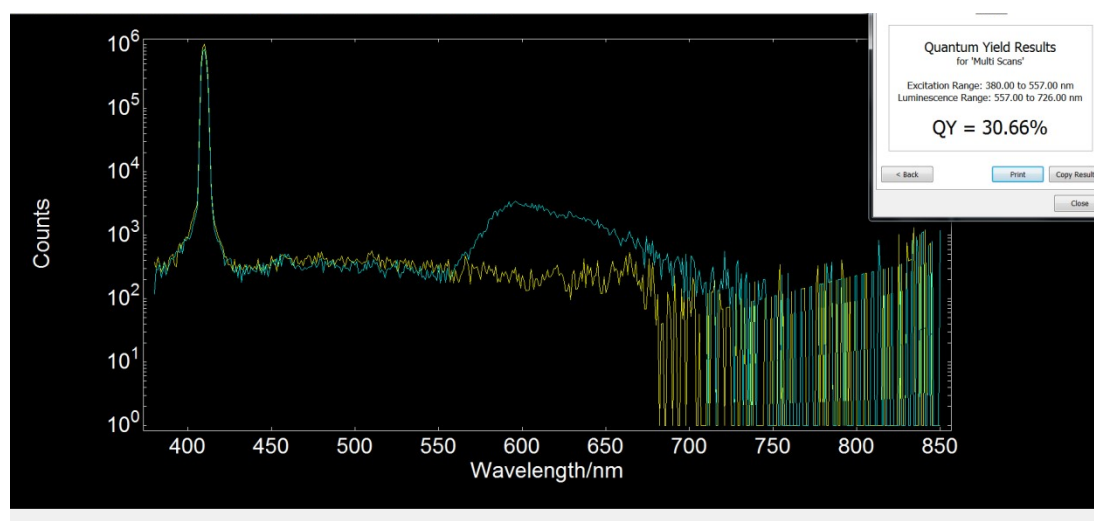

**Fig. S18.** The fluorescence quantum yield of the G3@Mg-gel/RhB at molar ratio 50:1

1 (a) J. J. Li, H. Y. Zhang, X. Y. Dai, Z. X. Liu and Y. Liu, Chem. Commun., 2020, **56**, 5949-5952; (b) G. P. Sun, W. R. Qian, J. M. Jiao, T. T. Han, Y. K. Shi, X. Y. Hu and L. Y. Wang, J. Mater. Chem. A, 2020, **8**, 9590-9596.

2 (a) J. J. Li, Y. Chen, J. Yu, N. Cheng, Y. Liu, Adv. Mater., 2017, **29**, 1701905; (b) S. Guo, Y. Song, Y. He, X. Y. Hu, L. Wang, Angew. Chem. Int. Ed., 2018, **57**, 3163; (c) M. Hao, G. P. Sun, M. Z. Zuo, Z. Q. Xu, Y. Chen, X. Y. Hu, L. Y. Wang, Angew. Chem. Int. Ed., 2019, **58**, 2.
